# Supplementary material for: Structures of the inactive and active states of RIP2 kinase inform on the mechanism of activation
Source: PubMed Central journal article supplement (PMC5436651; doi:10.1371/journal.pone.0177161), 2017-05-18
Supplement: pone.0177161.s005.pdf [file pone.0177161.s005.pdf]

| Protein name           | Protein Sequence                                                                                                                                                                                                                                                                                                                                 | MW (Da)  |
|------------------------|--------------------------------------------------------------------------------------------------------------------------------------------------------------------------------------------------------------------------------------------------------------------------------------------------------------------------------------------------|----------|
| RIP2K                  | GAMAMNGEAICSALPTIPYHKLADLRYLSRGASGTVSSARHADWRVQVAV<br>KHLHIHTPLLDSEKDVLRREAEILHKARFSYILPILGICNEPEFLGIVTEYMPN<br>GSLNELLHRKTEYPDVAWPLRFRILHEIALGVNYLHNMTPELLHHDLDKTQNI<br>LLDNEFHVKIADFGLSKWRMMSLSQSRSSKSAPEGGTIIYMPPENYEPGQKS<br>RASIKHDIYSYAVITWEVLSRKQPFEDVTNPLQIMYSVSVSQGHRPVINEESLPY<br>DIPHRARMISLIESGWAQNPDERPSFLKCLIELEPVLRTFEEI          | 34765.01 |
| RIP2K <sub>L294F</sub> | GAMAMNGEAICSALPTIPYHKLADLRYLSRGASGTVSSARHADWRVQVAV<br>KHLHIHTPLLDSEKDVLRREAEILHKARFSYILPILGICNEPEFLGIVTEYMPN<br>GSLNELLHRKTEYPDVAWPLRFRILHEIALGVNYLHNMTPELLHHDLDKTQNI<br>LLDNEFHVKIADFGLSKWRMMSLSQSRSSKSAPEGGTIIYMPPENYEPGQKS<br>RASIKHDIYSYAVITWEVLSRKQPFEDVTNPLQIMYSVSVSQGHRPVINEESLPY<br>DIPHRARMISLIESGWAQNPDERPSFLKCLIELEPV <b>F</b> RTFEEI | 34798.7  |
| RIP2K <sub>K47R</sub>  | GAMAMNGEAICSALPTIPYHKLADLRYLSRGASGTVSSARHADWRVQVAV<br><b>R</b> HHLHIHTPLLDSEKDVLRREAEILHKARFSYILPILGICNEPEFLGIVTEYMPN<br>GSLNELLHRKTEYPDVAWPLRFRILHEIALGVNYLHNMTPELLHHDLDKTQNI<br>LLDNEFHVKIADFGLSKWRMMSLSQSRSSKSAPEGGTIIYMPPENYEPGQKS<br>RASIKHDIYSYAVITWEVLSRKQPFEDVTNPLQIMYSVSVSQGHRPVINEESLPY<br>DIPHRARMISLIESGWAQNPDERPSFLKCLIELEPVLRTFEEI | 34793.9  |
| RIP2K <sub>D146N</sub> | GAMAMNGEAICSALPTIPYHKLADLRYLSRGASGTVSSARHADWRVQVAV<br>KHLHIHTPLLDSEKDVLRREAEILHKARFSYILPILGICNEPEFLGIVTEYMPN<br>GSLNELLHRKTEYPDVAWPLRFRILHEIALGVNYLHNMTPELLHH <b>N</b> LKTQNI<br>LLDNEFHVKIADFGLSKWRMMSLSQSRSSKSAPEGGTIIYMPPENYEPGQKS<br>RASIKHDIYSYAVITWEVLSRKQPFEDVTNPLQIMYSVSVSQGHRPVINEESLPY<br>DIPHRARMISLIESGWAQNPDERPSFLKCLIELEPVLRTFEEI  | 34764.9  |
| RIP2K <sub>R74A</sub>  | GAMAMNGEAICSALPTIPYHKLADLRYLSRGASGTVSSARHADWRVQVAV<br>KHLHIHTPLLDSEKDVLRREAEILHKA <b>A</b> FSYILPILGICNEPEFLGIVTEYMPN<br>GSLNELLHRKTEYPDVAWPLRFRILHEIALGVNYLHNMTPELLHHDLDKTQNI<br>LLDNEFHVKIADFGLSKWRMMSLSQSRSSKSAPEGGTIIYMPPENYEPGQKS<br>RASIKHDIYSYAVITWEVLSRKQPFEDVTNPLQIMYSVSVSQGHRPVINEESLPY<br>DIPHRARMISLIESGWAQNPDERPSFLKCLIELEPVLRTFEEI | 34679.92 |
| RIP2K <sub>R74D</sub>  | GAMAMNGEAICSALPTIPYHKLADLRYLSRGASGTVSSARHADWRVQVAV<br>KHLHIHTPLLDSEKDVLRREAEILHKA <b>D</b> FSYILPILGICNEPEFLGIVTEYMPN<br>GSLNELLHRKTEYPDVAWPLRFRILHEIALGVNYLHNMTPELLHHDLDKTQNI<br>LLDNEFHVKIADFGLSKWRMMSLSQSRSSKSAPEGGTIIYMPPENYEPGQKS<br>RASIKHDIYSYAVITWEVLSRKQPFEDVTNPLQIMYSVSVSQGHRPVINEESLPY<br>DIPHRARMISLIESGWAQNPDERPSFLKCLIELEPVLRTFEEI | 34723.93 |
| RIP2K <sub>R74H</sub>  | GAMAMNGEAICSALPTIPYHKLADLRYLSRGASGTVSSARHADWRVQVAV<br>KHLHIHTPLLDSEKDVLRREAEILHKA <b>F</b> FSYILPILGICNEPEFLGIVTEYMPN<br>GSLNELLHRKTEYPDVAWPLRFRILHEIALGVNYLHNMTPELLHHDLDKTQNI<br>LLDNEFHVKIADFGLSKWRMMSLSQSRSSKSAPEGGTIIYMPPENYEPGQKS<br>RASIKHDIYSYAVITWEVLSRKQPFEDVTNPLQIMYSVSVSQGHRPVINEESLPY<br>DIPHRARMISLIESGWAQNPDERPSFLKCLIELEPVLRTFEEI | 34746.28 |
