# Supplementary material for: Structures of the inactive and active states of RIP2 kinase inform on the mechanism of activation
Source: PubMed Central journal article supplement (PMC5436651; doi:10.1371/journal.pone.0177161), 2017-05-18
Supplement: pone.0177161.s006.pdf [file pone.0177161.s006.pdf]

|                       | Active RIP2K<br>(RIP2K-AMPPCP) |                         | Inactive RIP2K<br>(RIP2K <sub>K47R</sub> ) |
|-----------------------|--------------------------------|-------------------------|--------------------------------------------|
| Active BRAF_KD (1UWH) | 1.48 Å                         | Inactive BRAF_KD (4WO5) | 1.42 Å                                     |
| Active PKA (1ATP)     | 1.70 Å                         | Inactive PKA (4DFY)     | 2.81 Å                                     |
| Active CDK2 (1E9H)    | 2.02 Å                         | Inactive CDK2 (1B39)    | 1.89 Å                                     |
| Active EGFR_KD (2GS6) | 1.95 Å                         | Active EGFR_KD (2GS7)   | 1.91 Å                                     |
